# Supplementary material for: CircRNA hsa_circ_0006215 promotes osteogenic differentiation of BMSCs and enhances osteogenesis–angiogenesis coupling by competitively binding to miR-942-5p and regulating RUNX2 and VEGF
Source: publisher site journal article supplement (doi:10.18632/aging.202791), 2021-04-04
Supplement: Supplementary file [file aging-v13i7-202791-supplementary-material-SD1.pdf]

## SUPPLEMENTARY FIGURE

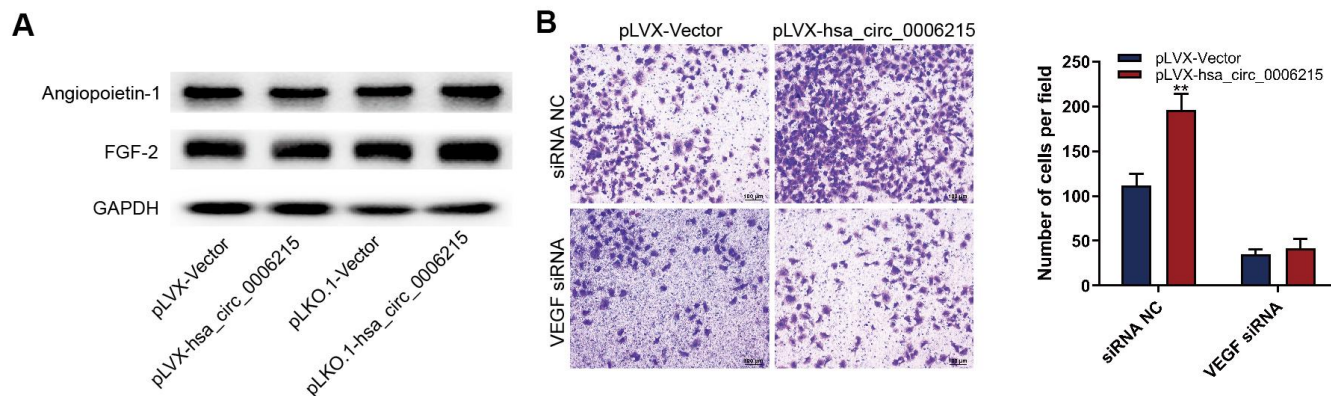

**Supplementary Figure 1. CircRNA hsa\_circ\_0006215 enhances osteogenesis–angiogenesis coupling by promoting VEGF expression.** (A) Western blots show angiopoietin-1 and FGF-2 expression. (B) Transwell assays of HUVECs migration with VEGF knockdown in BMSCs. BMSCs, bone marrow mesenchymal stem cells; HUVECs, human umbilical vein endothelial cells; VEGF, vascular endothelial growth factor.
