# Supplementary material for: CircRNA hsa_circ_0006215 promotes osteogenic differentiation of BMSCs and enhances osteogenesis–angiogenesis coupling by competitively binding to miR-942-5p and regulating RUNX2 and VEGF
Source: publisher site journal article supplement (doi:10.18632/aging.202791), 2021-04-04
Supplement: Supplementary file [file aging-v13i7-202791-supplementary-material-SD2.pdf]

## SUPPLEMENTARY TABLE

**Supplementary Table 1. Primer sequences for QRT-PCR.**

| <b>Primer name</b> | <b>Forward primer sequence</b> | <b>Reverse primer sequence</b> |
|--------------------|--------------------------------|--------------------------------|
| hsa_circ_0006215   | CCCCATGATCTCTTCACGGA           | GTGGTGATGTTTGTGTCCGC           |
| hsa_circ_0016033   | CTCCTCCATCAGCTTGTGACC          | CACAACAGTAGCCGGTCTTCA          |
| hsa_circ_0062045   | GGCCCCCTTTCTATGTTTCATGT        | CATCTGGCTGTGGCTGTACT           |
| hsa_circ_0069139   | AGAGACGGGATCGTCCACAG           | TGCCTTTTTCTCCCTGACAGTT         |
| hsa_circ_0082036   | TCCAAGGAAGTCATGTGCCAG          | GCCCAGATCACCTTTTGATGT          |
| hsa_circ_0050199   | GCCATTGTCTCCGAAGCGTA           | CCACAGGATGAACAGGGGAG           |
| hsa_circ_0058641   | TCACACTTCCTGTCATTGGCT          | CTATGAGTGCCCCTTGCCCTC          |
| hsa_circ_0040796   | TGGCTAACCTGTTACACTGGG          | CTGTGGGTGGATCATGGAGAG          |
| hsa_circ_0030026   | CAGGTCTGGTACCATTAGCGA          | ATTGCCTTCAACTGGGGCTC           |
| hsa_circ_0047940   | TGTGGTGATCCAGTCATGCG           | TCCATTGCAAAGTGAAGACACG         |
| hsa_circ_0035557   | CAGGTCTGGTACCATTAGCGA          | GCTCGGCCCAGGAAAAATATC          |
| hsa_circ_0048410   | TTTTAGTGTGGGCAGCTGGT           | CTGCTCTGGCCCTTCCAC             |
| hsa_circ_0073824   | AGATGCAGCTCGTGGATACG           | AACAGATAGTTGGAGAAAGGACC        |
| hsa_circ_0059514   | GGTCCTCGAGAGAAGATGCAG          | GCAGTGTGGTGCTTCCAGTT           |
| hsa_circ_0062856   | TACGGTACTTCCTGCCTCCA           | TTCGTGAGTGGTTCAGAGGA           |
| hsa_circ_0062847   | TTGGTTTGACTTACACGGGACA         | AGCAAGGGCACCAAACAAGA           |
| hsa_circ_0013330   | ATCCTCCGACCCCTCCTACAC          | GGTACGTGGCTGTCTCTGAC           |
| hsa_circ_0061541   | AGTTGGCCAATACTGGTGCC           | AGGTTCTTCTTCCTCTTCATCCG        |
| hsa_circ_0019789   | ACAAAATTGGAAAAAGATTGGCA        | ACACAATTACAAAATTCTTTAC         |
| hsa_circ_0049502   | AGGCTGGTCTCGAACTCCTGAC         | AGGCTGGTCTCGAACTCCTGAC         |
| hsa_circ_0048536   | AGGTGGTGAAACAATCTTGATGA        | TTCCCACAAGGCACATCCTC           |
| GAPDH              | ATGTTGCAACCGGGAAGGAA           | AGGAAAAGCATCACCCGGAG           |
| VEGF               | GTCCTGGAGCGTGTACGTTG           | CTTCCGGGCTCGGTGATTTA           |
| RUNX2              | CGCCTCACAAACAACCACAG           | TCACTGTGCTGAAGAGGCTG           |
